# Supplementary material
Source: PubMed Central journal article supplement (PMC7483435)
Supplement: bloodBLD2019001808-suppl1.pdf [file bloodBLD2019001808-suppl1.pdf]

A

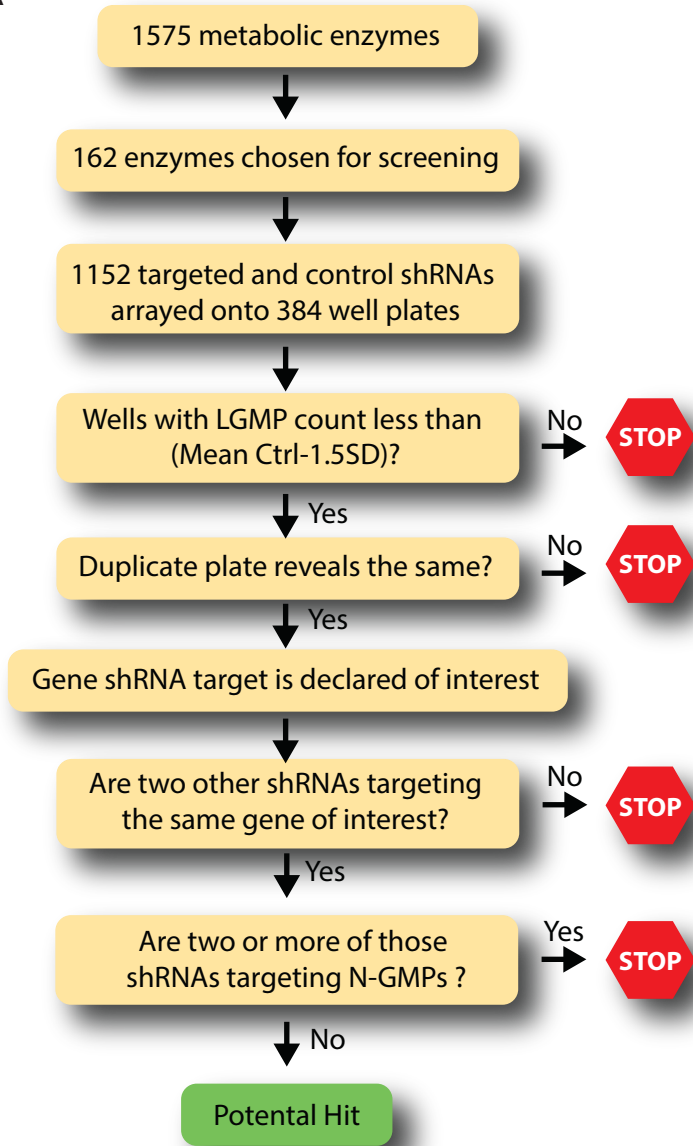

A

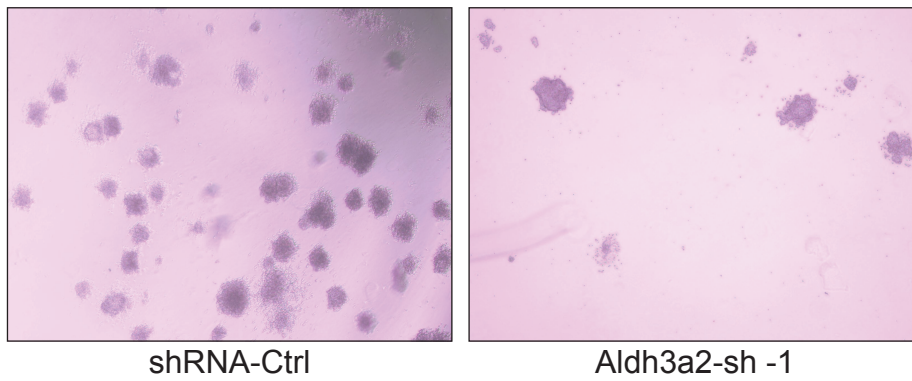

B

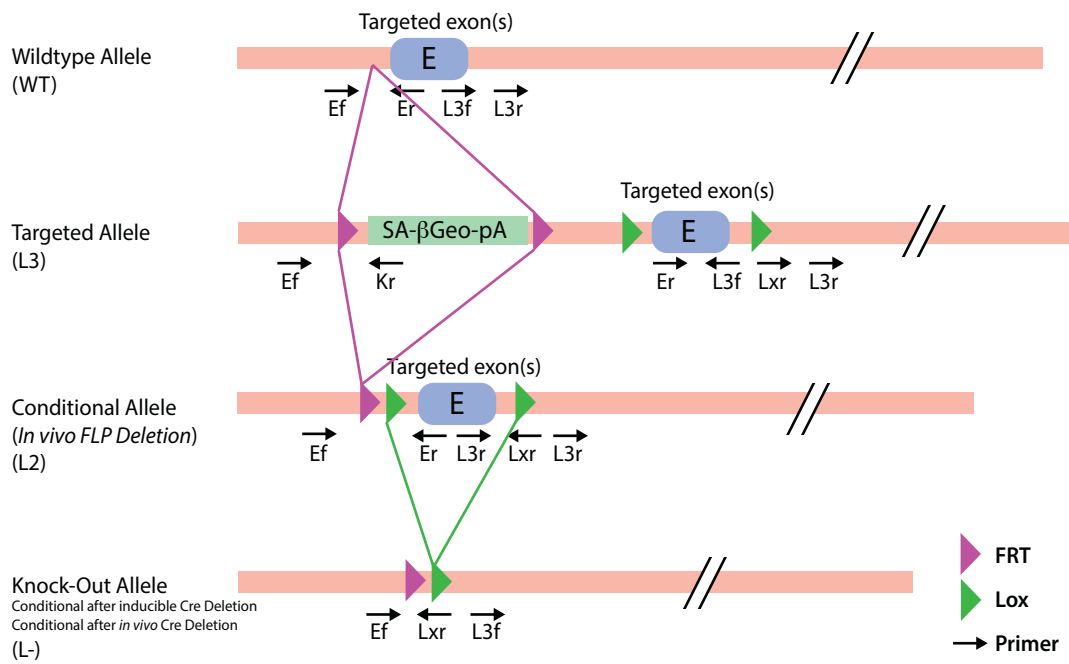

C

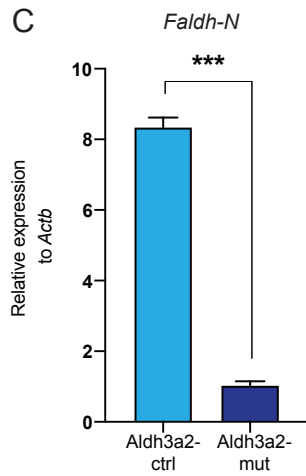

D

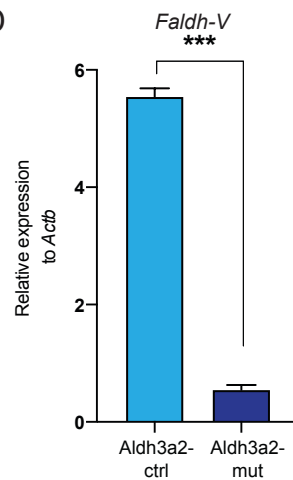

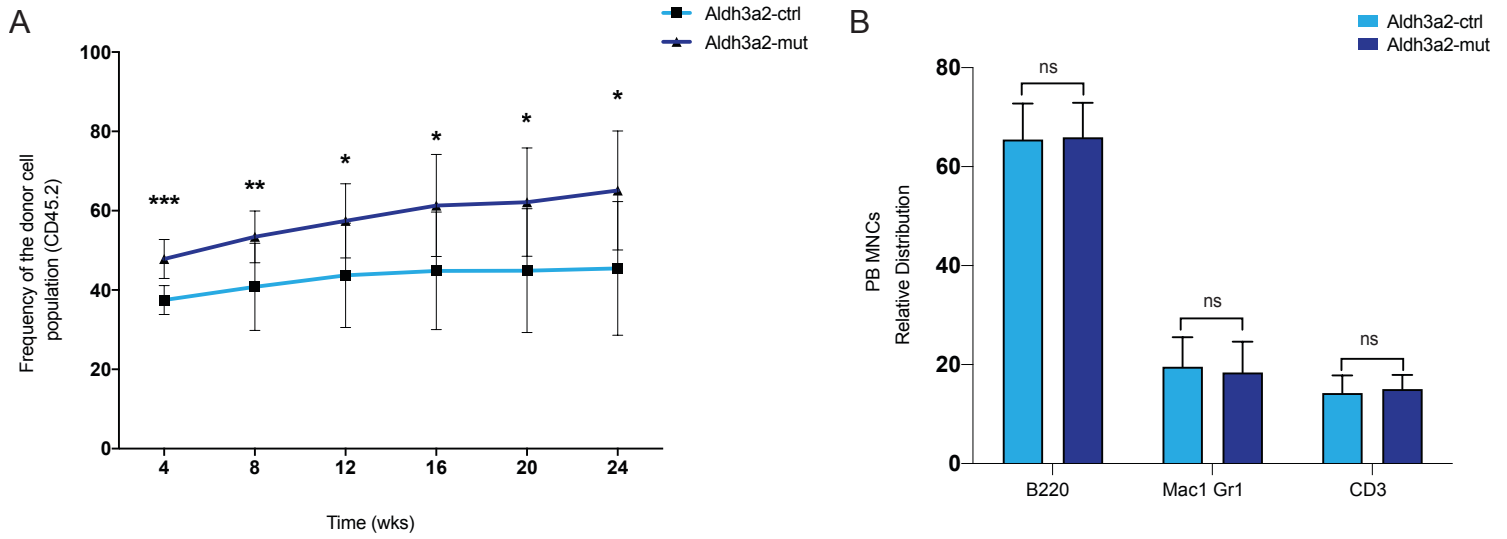

Yusuf RZ et al., Supp. Figure 3

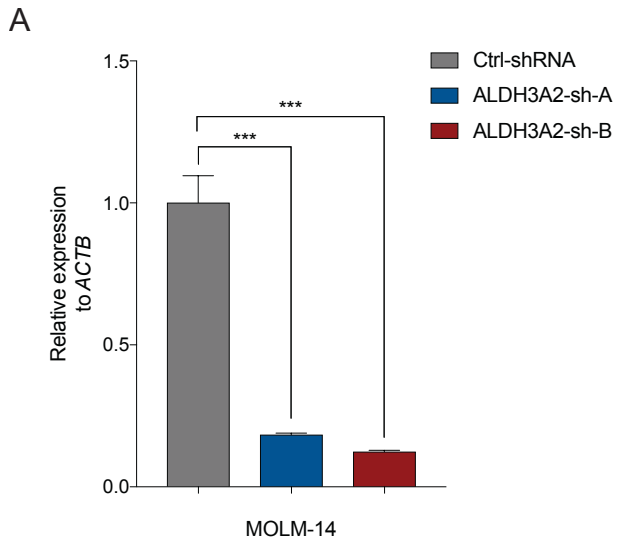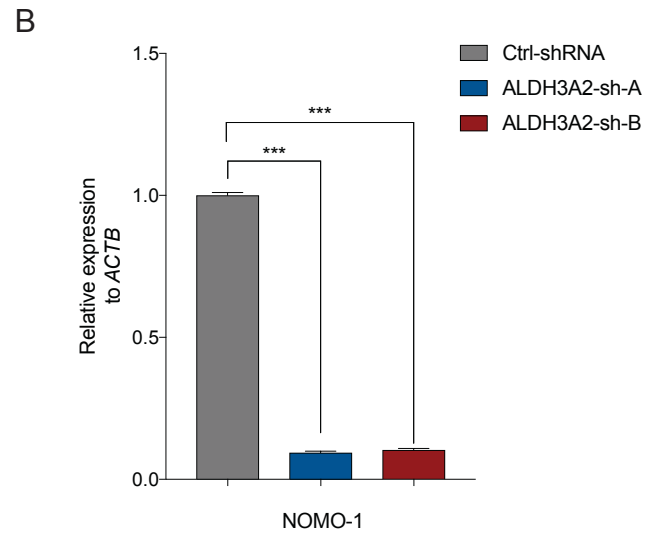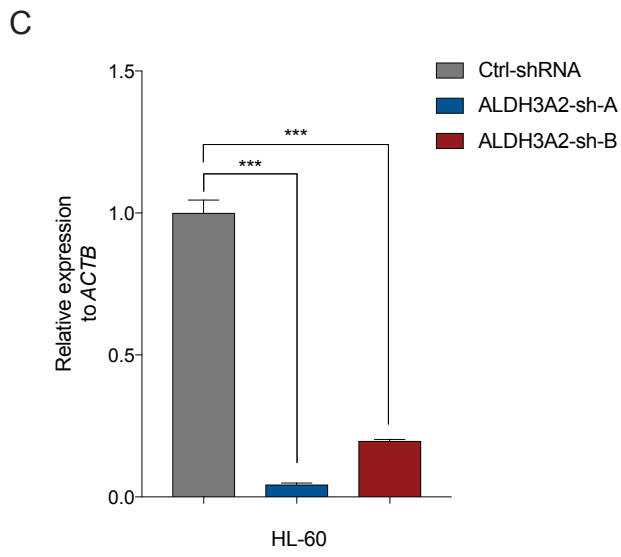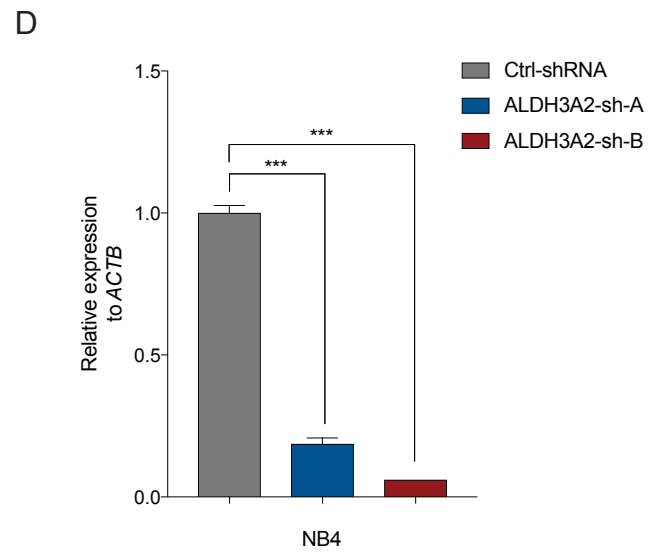



A

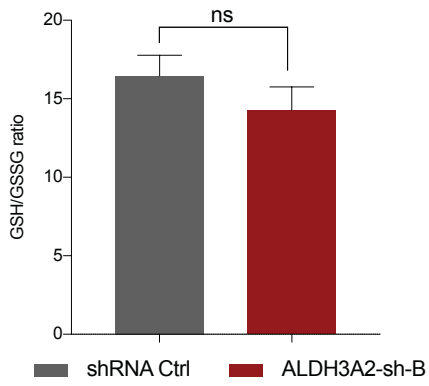

B

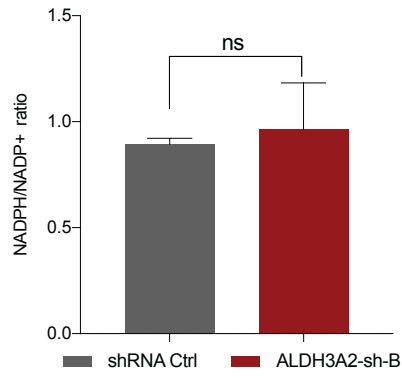

C

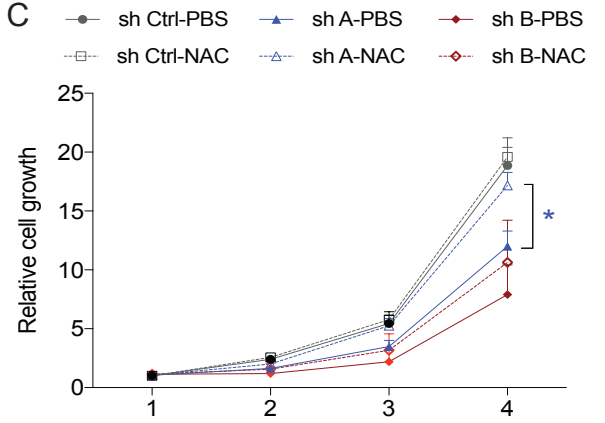

D

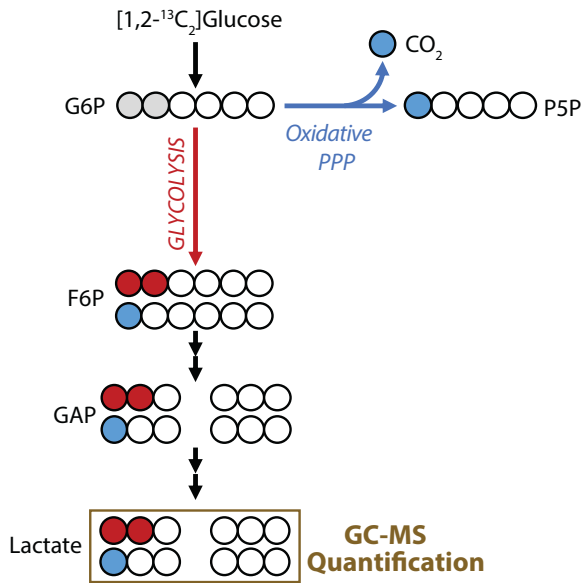

E

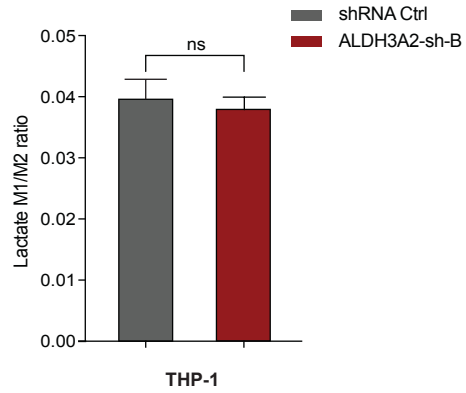

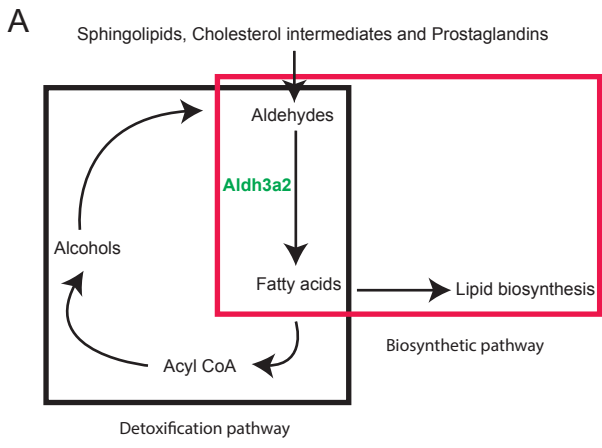

Yusuf RZ et al., Supp. Figure 6

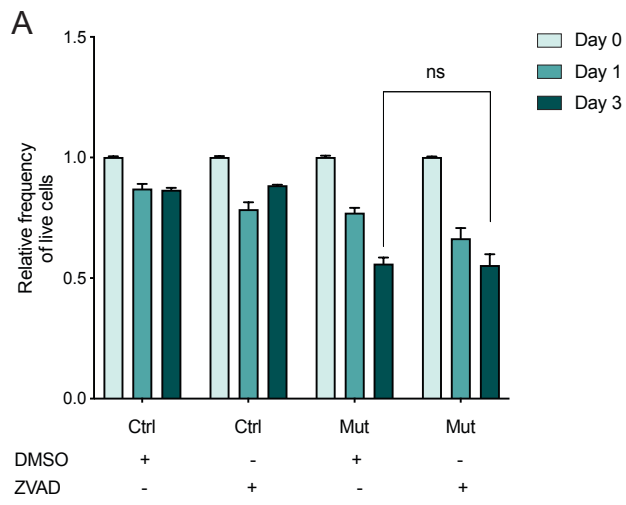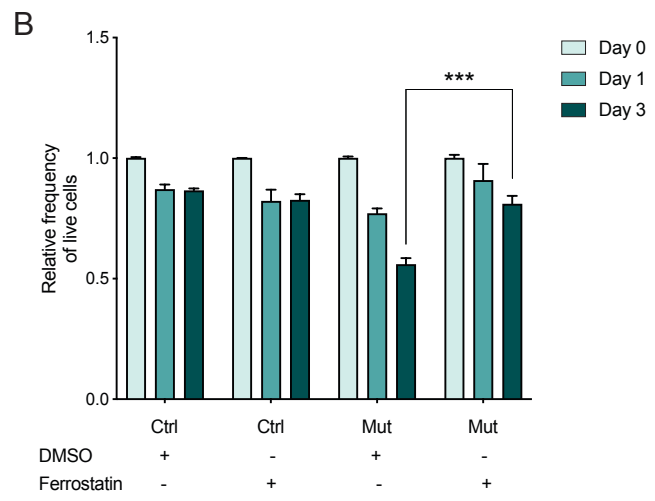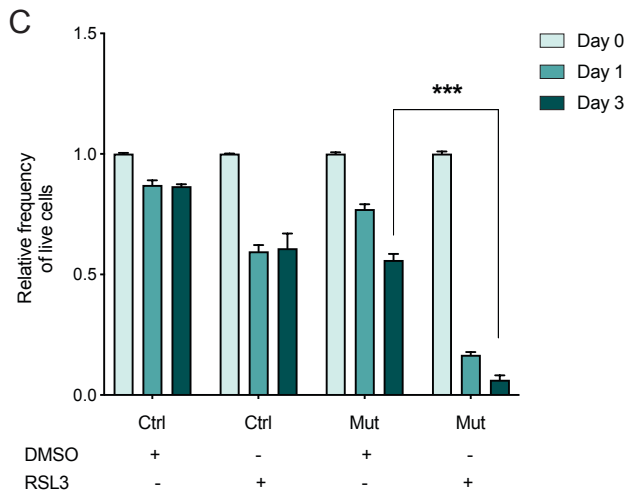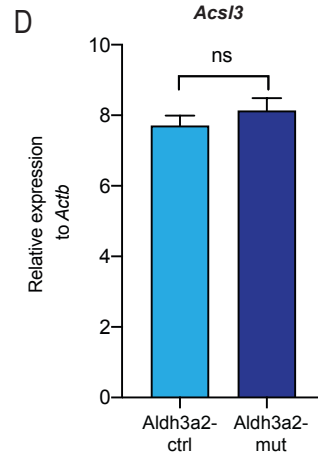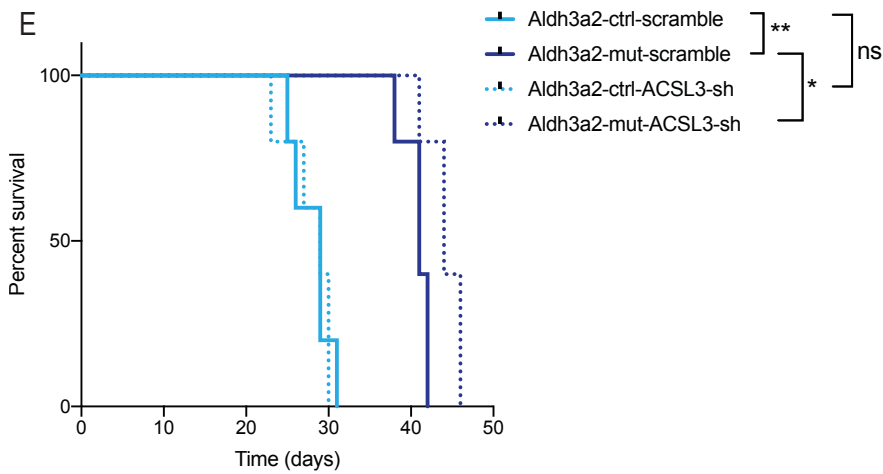

## Supplementary Materials and Methods

---

### Generation of N-GMPs, L-GMPs and murine bone marrow stroma

L-GMPs: In order to generate L-GMPs six to eight-week old male mice carrying the DsRed fluorescent protein under the beta-actin promoter, henceforth referred to as DsRed mice, were treated with 5-fluorouracil (5-FU) (Millipore Sigma). Single cell suspension of red blood cell-lysed bone marrow was infected with MSCV based retrovirus carrying the MLL-AF9 oncogene in tandem with a neomycin resistance gene (gift from Dr. Scott Armstrong) using polybrene (Millipore Sigma). After two rounds of infection, the infected cells were transplanted into lethally irradiated (9 Gy of irradiation from a <sup>137</sup>Cesium gamma source) C57BL/6J mice. These recipient mice designated “primary leukemic mice” became moribund at 8-12 weeks after transplant and were euthanized at the first signs of illness. Mononuclear bone marrow cells from these mice were transplanted into sub-lethally irradiated (4.5 Gy) C57BL/6J mice. These recipients, designated “secondary leukemic mice”, became moribund at four weeks and were sacrificed at the first signs of illness. Mononuclear bone marrow from secondary leukemic mice was subjected to flow sorting in order to obtain DsRed positive L-GMPs according to the scheme of Kristov *et al.*<sup>1</sup>

NGMPs: N-GMPs were flow sorted from red blood cell lysed bone marrow from Ds-Red mice as described.<sup>2</sup>

Primary murine bone marrow stroma: Each batch of stroma was made from four actin-GFP mice. Mononuclear whole bone marrow was plated in alpha-MEM (Gibco) with 20 percent Fetal Bovine Serum (FBS) (Gibco) and 1 percent Penicillin Streptomycin (P/S) (ThermoFisher Scientific) for 28 days (media changes after 2, 14 and 28 days). Cells were selected for CD105<sup>+</sup> cells using biotinylated CD105 antibody and Streptavidin magnetic beads (Dynabeads Biotin Binder, ThermoFisher Scientific) and columns and passaged four times. This fourth passage was maintained in media for 4 days, and these cells and their media was used for all experiments. The media in which these cells were maintained is referred to as “conditioned media”.

### Production of retroviruses and lentiviruses

The MLL-AF9 construct in an MSCV-neomycin vector was a gift from Dr. Scott Armstrong and retroviral production was carried out in HEK293-T cells (American Type Tissue Collection or ATCC) using the pCL-Eco plasmid (Addgene) and Fugene HD transfection reagent (Promega) according to the manufacturer's instructions.

Lentiviruses were made according to The Broad Institute protocol for shRNA/sgRNA/ORF low throughput viral production (10 cm dish/6 well plate) found here: <https://portals.broadinstitute.org/gpp/public/resources/protocols>.

### Infection of L-GMPs and N-GMPs

Bone marrow mononuclear cells from 5 secondary leukemia mice (for L-GMPs) or 10 DsRed mice (for N-GMPs) were plated in transfection media which contained 10 ng/ml of Stem Cell Factor (SCF, Peprotech) 10 ng/ml of Interleukin 6 (IL-6, Peprotech) and 6 ng/ml of Interleukin 3 (IL-3, Peprotech) and infected with retrovirus using polybrene and spinfection (2 times, 24 hours apart). Cells were harvested 3 hours after spinfection.

### RT-qPCR

RNA was extracted from cells using the RNeasy Micro Kit (Qiagen) and RT-PCR was performed using the SuperScript™ IV One-Step RT-PCR System according to the manufacturer's instructions. Taqman probes were used to perform qPCR for murine and human *Aldh3a2*.

### Flow cytometry

The cocktail of antibodies staining for lineage antigens for N-GMPs consisted of biotin-labelled anti-mouse antibodies against, CD3e, CD4, CD8, CD19, B220, Gr-1, Mac-1 (from BD Biosciences) and CD127 antigens (from Biolegend). The cocktail of antibodies staining for lineage antigens for L-GMPs consisted of biotin-labelled anti-mouse antibodies against, CD3e, CD4, CD8, CD19, B220, Gr-1 (from BD Biosciences) and CD127 antigens (from Biolegend). Flow sorting was performed using the BD FACSAria

II. Analysis was performed using FlowJo Software (TreeStar Software). Secondary stains were performed as previously described.<sup>1,3</sup>

Proliferation was assessed by staining with a PE-conjugated mouse anti-Ki-67 antibody (BD Pharmingen; 1/10) and Hoechst 33342 (40µg/ml; Invitrogen) after fixation and permeabilization of the cells (BD Cytfix/Cytoperm Kit, BD Biosciences). Apoptosis was detected using active Caspase 3-PE (PE Active Caspase-3 Apoptosis Kit; BD Pharmingen) after fixation and permeabilization of the cells. Double-stranded DNA breaks and oxidative DNA damage were measured by staining respectively with an AlexaFluor 647-conjugated mouse anti-H2AX (pS139) antibody (BD Biosciences) and a FITC-conjugated mouse anti-8-OHdG antibody (Abcam) after fixation and permeabilization of the cells. Oxidative protein damage was detected by measuring protein carbonylation (FlowCelect Oxidative Stress Characterization Kit; Sigma-Aldrich). All stainings were performed according to the manufacturer's instructions.

#### Methylcellulose assays

Ten thousand N-GMPs or L-GMPs infected with lentiviruses expressing relevant shRNAs were added to 3 ml of methylcellulose (StemCell Technologies) plated per well of a 6 well plate. Number of cells were counted on day 7.

#### Metzeler Database Analysis

Raw CEL file data was downloaded from the Metzeler database<sup>4</sup> from GEO using the Bioconductor package, GEOquery<sup>5</sup> and processed using the 'affy' BioConductor package.<sup>6</sup> Arrays were quality-controlled with arrayQualityMetrics<sup>7</sup> and RMA normalized.<sup>8</sup> Median probe intensities for genes of interest were calculated and combined with survival data and subjected to survival analysis.

#### Estimation of oxidative pentose phosphate pathway activity

THP-1 cells transduced with lentivirus expressing Aldh3a2 shRNA B or Control shRNA were cultured in glucose-free Roswell Park Memorial Institute medium (RPMI, ThermoFisher Scientific) supplemented with 1 0mM [1,2-<sup>13</sup>C<sub>2</sub>]-glucose (Cambridge Isotope Laboratories) for 24 hours. Polar metabolites were isolated through methanol-

chloroform extraction and derivatized by a two-step process. First, 15 µl of methoxyamine in pyridine (MOX Reagent, Thermo Pierce) was added before incubation at 40°C for 1.5 h. Next, 20 µl N-(tert-butyldimethylsilyl)-N-methyl-trifluoroacetamide, with 1% tert-Butyldimethylchlorosilane (TBDMS) (Sigma) was added, and samples were incubated at 60°C for 1 h. The reaction mixtures were quickly vortexed, centrifuged at 21,000 x g for 1 min, and supernatant was transferred to GC-MS vials for analysis.

Polar metabolites were analyzed on a 6890N GC with a DB-35ms Ultra Inert capillary column coupled to a 5975B Inert XL MS (Agilent). The flow rate of the helium carrier gas (Airgas) was maintained at 1 ml/min. The inlet temperature was held at 270°C. Injection volumes and split ratios ranged from 2 µl splitless to 1 µl with a 1:10 split, depending on sample concentration and detected ion abundances. Both scan and selected ion monitoring (SIM) modes were used to detect measured ions (with SIM parameters identical to previously published values.<sup>9</sup> The instrument was operated in electron ionization mode with an energy of 70 eV. For polar metabolite samples, the GC oven was first held at 100°C for 3 min, then ramped at 2.5°C/min to 300°C; masses were profiled from 150 to 625 amu when in scan mode. Raw abundance data was converted to mass isotopomer distributions (MIDs) and corrected for natural abundance using an in-house software operating in Matlab (MathWorks).<sup>10</sup> Activity of the oxidative pentose phosphate pathway was estimated by making the ratio of M+1 lactate over M+2 lactate as detailed in Supplementary Figure 5.

## Supplementary References

---

1. Krivtsov AV, Twomey D, Feng Z, et al. Transformation from committed progenitor to leukaemia stem cell initiated by MLL-AF9. *Nature*. 2006;442(7104):818-822.
2. Akashi K, Traver D, Miyamoto T, Weissman IL. A clonogenic common myeloid progenitor that gives rise to all myeloid lineages. *Nature*. 2000;404(6774):193-197.
3. Saez B, Ferraro F, Yusuf RZ, et al. Inhibiting stromal cell heparan sulfate synthesis improves stem cell mobilization and enables engraftment without cytotoxic conditioning. *Blood*. 2014;124(19):2937-2947.

4. Metzeler KH, Hummel M, Bloomfield CD, et al. An 86-probe-set gene-expression signature predicts survival in cytogenetically normal acute myeloid leukemia. *Blood*. 2008;112(10):4193-4201.
5. Davis S, Meltzer PS. GEOquery: a bridge between the Gene Expression Omnibus (GEO) and BioConductor. *Bioinformatics*. 2007;23(14):1846-1847.
6. Gautier L, Cope L, Bolstad BM, Irizarry RA. affy--analysis of Affymetrix GeneChip data at the probe level. *Bioinformatics*. 2004;20(3):307-315.
7. Kauffmann A, Gentleman R, Huber W. arrayQualityMetrics--a bioconductor package for quality assessment of microarray data. *Bioinformatics*. 2009;25(3):415-416.
8. Irizarry RA, Bolstad BM, Collin F, Cope LM, Hobbs B, Speed TP. Summaries of Affymetrix GeneChip probe level data. *Nucleic Acids Res*. 2003;31(4):e15.
9. Ahn WS, Antoniewicz MR. Metabolic flux analysis of CHO cells at growth and non-growth phases using isotopic tracers and mass spectrometry. *Metab Eng*. 2011;13(5):598-609.
10. Fernandez CA, Des Rosiers C, Previs SF, David F, Brunengraber H. Correction of <sup>13</sup>C mass isotopomer distributions for natural stable isotope abundance. *J Mass Spectrom*. 1996;31(3):255-262.

## Supplementary Tables

---

**Supplementary Table 1A: 117 rate limiting enzymes curated from classic texts**

| Gene name                                                                         | Gene Symbol | Mouse gene ID |
|-----------------------------------------------------------------------------------|-------------|---------------|
| 3-hydroxy-3-methylglutaryl-Coenzyme A reductase                                   | Hmgcr       | 15357         |
| 6-phosphofructo-2-kinase/fructose-2,6-biphosphatase 1                             | Pfkfb1      | 18639         |
| 6-phosphofructo-2-kinase/fructose-2,6-biphosphatase 2                             | Pfkfb2      | 18640         |
| 6-phosphofructo-2-kinase/fructose-2,6-biphosphatase 3                             | Pfkfb3      | 170768        |
| 6-phosphofructo-2-kinase/fructose-2,6-biphosphatase 4                             | Pfkfb4      | 270198        |
| Acetyl-Coenzyme A acyltransferase 2 (mitochondrial 3-oxoacyl-Coenzyme A thiolase) | Acaa2       | 52538         |
| Acetyl-Coenzyme A carboxylase alpha                                               | Acaca       | 107476        |
| Acetyl-Coenzyme A carboxylase beta                                                | Acacb       | 100705        |
| Adenylosuccinate synthetase like 1                                                | Adssl1      | 11565         |
| Adenylosuccinate synthetase, non muscle                                           | Adss        | 11566         |
| ADP-dependent glucokinase                                                         | Adpgk       | 72141         |
| Arginase type II                                                                  | Arg2        | 11847         |
| Arginase, liver                                                                   | Arg1        | 11846         |
| Argininosuccinate synthetase 1                                                    | Ass1        | 11898         |
| ATP citrate lyase                                                                 | Acly        | 104112        |
| ATPase inhibitory factor 1                                                        | Atpif1      | 11983         |
| Brain glycogen phosphorylase                                                      | Pygp        | 110078        |
| Carbamoyl-phosphate synthetase 1                                                  | Cps1        | 227231        |
| Carbamoyl-phosphate synthetase 2, aspartate transcarbamylase, and dihydroorotase  | Cad         | 69719         |
| Carnitine acetyl transferase                                                      | Crat        | 12908         |
| Citrate lyase beta like                                                           | Clybl       | 69634         |



|                                                                                                                                             |         |        |
|---------------------------------------------------------------------------------------------------------------------------------------------|---------|--------|
| Citrate synthase                                                                                                                            | Cs      | 12974  |
| Citrate synthase like                                                                                                                       | Csl     | 71832  |
| Cytochrome c oxidase subunit IV isoform 1                                                                                                   | Cox4i1  | 12857  |
| Cytochrome c oxidase subunit IV isoform 2                                                                                                   | Cox4i2  | 84682  |
| Dihydrolipoamide S-acetyltransferase (E2 component of pyruvate dehydrogenase complex)                                                       | Dlat    | 235339 |
| Enoyl-CoenzymeA, hydratase/3-hydroxyacyl coenzyme                                                                                           | Ehhadh  | 74147  |
| Eph receptor B2                                                                                                                             | Ephb2   | 13844  |
| Fructose biphosphatase 1                                                                                                                    | Fbp1    | 14121  |
| Fructose biphosphatase 2                                                                                                                    | Fbp2    | 14120  |
| fructose biphosphatase 3                                                                                                                    | Fbp3    | 14122  |
| Glucokinase                                                                                                                                 | Gck     | 103988 |
| Glucose 6 phosphatase, catalytic, 3                                                                                                         | G6pc3   | 68401  |
| Glucose 6-phosphatase, related sequence                                                                                                     | G6pdrs  | 107634 |
| glucose-6-phosphatase, catalytic                                                                                                            | G6pc    | 14377  |
| Glucose-6-phosphatase, catalytic, 2                                                                                                         | G6pc2   | 14378  |
| Glucose-6-phosphate dehydrogenase 2                                                                                                         | G6pd2   | 14380  |
| Glucose-6-phosphate dehydrogenase X-linked                                                                                                  | G6pdx   | 14381  |
| Glutamate-ammonia ligase (glutamine synthetase)                                                                                             | Glul    | 14645  |
| Glutathione peroxidase 1                                                                                                                    | Gpx1    | 14775  |
| Glutathione peroxidase 2                                                                                                                    | Gpx2    | 14776  |
| Glutathione peroxidase 3                                                                                                                    | Gpx3    | 14778  |
| Glutathione peroxidase 4                                                                                                                    | Gpx4    | 625249 |
| Glutathione peroxidase 5                                                                                                                    | Gpx5    | 14780  |
| Glutathione peroxidase 6                                                                                                                    | Gpx6    | 75512  |
| Glutathione peroxidase 7                                                                                                                    | Gpx7    | 67305  |
| Glutathione peroxidase 8                                                                                                                    | Gpx8    | 69590  |
| Glycogen synthase1, muscle                                                                                                                  | Gys1    | 14936  |
| Glycogen synthase 2                                                                                                                         | Gys2    | 232493 |
| Hadha hydroxyacyl-Coenzyme A dehydrogenase/3-ketoacyl-Coenzyme A thiolase/enoyl-Coenzyme A hydratase (trifunctional protein), alpha subunit | Hadha   | 97212  |
| Heme oxygenase (decycling) 1                                                                                                                | Hmox1   | 15368  |
| Heme oxygenase (decycling) 2                                                                                                                | Hmox2   | 15369  |
| Hexokinase 1                                                                                                                                | Hk1     | 15275  |
| Hexokinase 2                                                                                                                                | Hk2     | 15277  |
| Hexokinase 3                                                                                                                                | Hk3     | 212032 |
| Hexokinase-1 related sequence 1                                                                                                             | Hk1-rs1 | 110286 |
| Hydroxyacyl-Coenzyme A dehydrogenase/3-ketoacyl-Coenzyme A thiolase/enoyl-Coenzyme A hydratase (trifunctional protein), beta subunit        | Hadhb   | 231086 |
| Inosine 5'-phosphate dehydrogenase 1                                                                                                        | Impdh1  | 23917  |
| Inosine 5'-phosphate dehydrogenase 2                                                                                                        | Impdh2  | 23918  |
| Isocitrate dehydrogenase 1 (NADP+), soluble                                                                                                 | Idh1    | 15926  |
| Isocitrate dehydrogenase 2 (NADP+), mitochondrial                                                                                           | Idh2    | 269951 |
| Isocitrate dehydrogenase 3 (NAD+) alpha                                                                                                     | Idh3a   | 67834  |
| Isocitrate dehydrogenase 3 (NAD+) beta                                                                                                      | Idh3b   | 170718 |
| Isocitrate dehydrogenase 3 (NAD+), gamma                                                                                                    | Idh3g   | 15929  |
| Ketohexokinase                                                                                                                              | Khk     | 16548  |

|                                                              |           |        |
|--------------------------------------------------------------|-----------|--------|
| Lactate dehydrogenase A                                      | Ldha      | 16828  |
| Lactate dehydrogenase A-like 6B                              | Ldhal6b   | 106557 |
| Lactate dehydrogenase B                                      | Ldhb      | 16832  |
| Lactate dehydrogenase C                                      | Ldhc      | 16833  |
| Lactate dehydrogenase D                                      | Ldhd      | 52815  |
| Lens protein with glutamine synthetase domain                | Lgsn      | 266744 |
| Liver glycogen phosphorylase                                 | Pygl      | 110095 |
| Malic enzyme 1, NADP(+)-dependent, cytosolic                 | Me1       | 17436  |
| Malic enzyme 2, NAD(+)-dependent, mitochondrial              | Me2       | 107029 |
| Malic enzyme 3, NADP(+)-dependent, mitochondrial             | Me3       | 109264 |
| Malic enzyme complex, mitochondrial                          | Mod2      | 110357 |
| Malic enzyme, related sequence                               | Mod-rs    | 110087 |
| Mitogen-activated protein kinase 1                           | Mapk1     | 26413  |
| Mitogen-activated protein 2 kinase 2                         | Map2k2    | 26396  |
| Mitogen-activated protein 2 kinase 5                         | Map2k5    | 23938  |
| mitogen-activated protein 2 kinase 2                         | Map3k2    | 26405  |
| MLX interacting protein-like                                 | Mlxipl    | 58805  |
| Muscle glycogen phosphorylase                                | Pygm      | 19309  |
| N-acetylglutamate synthase                                   | Nags      | 217214 |
| Ornithine transcarbamylase                                   | Otc       | 18416  |
| Oxoglutarate dehydrogenase (lipoamide)                       | Ogdh      | 18293  |
| Phosphoenolpyruvate carboxykinase 1, cytosolic               | Pck1      | 18534  |
| Phosphoenolpyruvate carboxykinase 2                          | Pck2      | 74551  |
| Phosphofructokinase, liver, B-type                           | Pfkl      | 18641  |
| Phosphofructokinase, muscle                                  | Pfkm      | 18642  |
| Phosphofructokinase, platelet                                | Pfkp      | 56421  |
| Phosphofructokinase, polypeptide X                           | Pfkx      | 18642  |
| Phosphogluconate dehydrogenase                               | Pgd       | 110208 |
| Phosphoribosyl pyrophosphate amidotransferase                | Ppat      | 231327 |
| Phosphoribosyl pyrophosphate synthetase 1                    | Prps1     | 19139  |
| Phosphoribosyl pyrophosphate synthetase 1-like 1             | Prps1l1   | 75456  |
| Phosphoribosyl pyrophosphate synthetase 2                    | Prps2     | 110639 |
| Phosphoribosyl pyrophosphate synthetase-associated protein 1 | Prpsap1   | 67763  |
| Protein kinase, cAMP dependent regulatory, type I            | Prkar1b   | 19085  |
| Protein kinase, cAMP dependent regulatory, type I, alpha     | Prkar1a   | 19084  |
| Protein kinase, cAMP dependent regulatory, type II alpha     | Prkar2a   | 19087  |
| Protein kinase, cAMP dependent regulatory, type II beta      | Prkar2b   | 19088  |
| Protein kinase, cAMP dependent, catalytic, alpha             | Prkaca    | 18747  |
| Protein kinase, cAMP dependent, catalytic, beta              | Prkacb    | 18749  |
| Pyruvate carboxylase                                         | Pcx       | 18563  |
| Pyruvate dehydrogenase (lipoamide) beta                      | Pdhb      | 68263  |
| Pyruvate dehydrogenase complex, component X                  | Pdhx      | 27402  |
| Pyruvate dehydrogenase E1 alpha 1                            | Pdha1     | 18597  |
| Pyruvate dehydrogenase E1 alpha 2                            | Pdha2     | 18598  |
| Pyruvate kinase liver and red blood cell                     | Pklr      | 18770  |
| Pyruvate kinase, muscle                                      | Pkm2      | 18746  |
| Ribonucleotide reductase M1                                  | Rrm1      | 20133  |
| Ribonucleotide reductase M1, related sequence 13             | Rrm1-rs13 | 110820 |
| Ribonucleotide reductase M2                                  | Rrm2      | 20135  |

|                                                                                         |          |        |
|-----------------------------------------------------------------------------------------|----------|--------|
| Ribonucleotide reductase M2 B                                                           | Rrm2b    | 382985 |
| Solute carrier family 25 (mitochondrial carnitine/acylcarnitine translocase), member 20 | Slc25a20 | 57279  |
| UDP-glucose pyrophosphorylase 2                                                         | Ugp2     | 216558 |

**Supplementary Table 1B: Genes over-expressed in L-GMPs versus N-GMPs (from Krivstov *et al.*<sup>1</sup>)**

| Gene name                                                        | Gene Symbol | Mouse gene ID |
|------------------------------------------------------------------|-------------|---------------|
| AcylCoA dehydrogenase 11                                         | Acad11      | 11370         |
| Lysosomal; acid phosphatase 2                                    | Acp2        | 11432         |
| Aldehyde dehydrogenase family 3, member A2                       | Aldh3a2     | 11671         |
| Aldehyde dehydrogenase family 3, member B1                       | Aldh3b1     | 67689         |
| aldolase C fructose bisphosphate                                 | Aldoc       | 11676         |
| adenosine monophosphate deaminase 3                              | Ampd3       | 11717         |
| Aspartocyclase                                                   | Aspa        | 11484         |
| ATPase, H <sup>+</sup> transporting, lysosomal V1 subunit E1     | ATP6v1e1    | 11973         |
| UDP-GlcNAc:betaGal beta-1,3-N-acetylglucosaminyltransferase 8    | B3gnt8      | 232984        |
| Beta-1,4-N-acetyl-galactosaminyl transferase 1                   | B4galnt1    | 14421         |
| Biliverdin reductase B (flavin reductase (NADPH))                | Blvrb       | 233016        |
| CDP-diacylglycerol synthase (phosphatidate cytidyltransferase) 2 | Cds2        | 110911        |
| Creatine kinase, muscle                                          | Ckm         | 12715         |
| Cytochrome b-245, alpha polypeptide                              | Cyba        | 13057         |
| Cytochrome P450, family 4, subfamily f, polypeptide 18           | Cyp4f18     | 72054         |
| Dicarbonyl L-xylulose reductase                                  | Dcxr        | 67880         |
| Diacylglycerol O-acyltransferase 1                               | Dgat1       | 13350         |
| Diacylglycerol kinase, gamma                                     | Dgkg        | 110197        |
| Dehydrogenase/reductase (SDR family) member 1                    | Dhrs1       | 52585         |
| Ectonucleoside triphosphate diphosphohydrolase 1                 | Entpd1      | 12495         |
| Ferrochelatase                                                   | Fech        | 14151         |
| Flavin containing monooxygenase 5                                | Fmo5        | 14263         |
| Guanine deaminase                                                | Gda         | 14544         |
| Glucosamine (N-acetyl)-6-sulfatase                               | Gns         | 75612         |
| Glutathione peroxidase 3                                         | Gpx3        | 14778         |
| Glutathione reductase                                            | Gsr         | 14782         |
| Hydroxyprostaglandin dehydrogenase 15 (NAD)                      | Hpgd        | 15446         |
| Indolethylamine N-methyltransferase                              | Inmt        | 21743         |
| Ketohexokinase                                                   | Khk         | 16548         |
| Monoglyceride lipase                                             | Mgll        | 23945         |
| Monoacylglycerol O-acyltransferase 2                             | Mogat2      | 233549        |
| Neuraminidase 1                                                  | Neu1        | 18010         |
| Phosphodiesterase 1B, Ca <sup>2+</sup> -calmodulin dependent     | Pde1b       | 18574         |
| Phosphodiesterase 3A, cGMP inhibited                             | Pde3a       | 54611         |
| Phosphodiesterase 8A                                             | Pde8a       | 18584         |
| Phosphogluconate dehydrogenase                                   | Pgd         | 110208        |
| Phospholipase C, beta 2                                          | Plcb2       | 18796         |

|                                                                                |          |        |
|--------------------------------------------------------------------------------|----------|--------|
| Procollagen-lysine, 2-oxoglutarate 5-dioxygenase 1                             | Plod1    | 18822  |
| Phosphomannomutase 2                                                           | Pmm      | 54128  |
| Paraoxonase 3                                                                  | Pon3     | 269823 |
| Phosphatidylserine synthase 2                                                  | Ptdss2   | 27388  |
| Liver glycogen phosphorylase                                                   | Pygl     | 110095 |
| Spermidine/spermine N1-acetyltransferase 1                                     | Sat1     | 20229  |
| Solute carrier family 25 (mitochondrial carrier, phosphate carrier), member 25 | Slc25a25 | 227731 |
| UDP-glucose pyrophosphorylase 2                                                | Ugp2     | 216558 |

## Supplementary Figure Legends

---

**Supplementary Figure 1. *Metabolism-focused screen in L-GMPs and N-GMPs.***  
Filters and algorithm applied to the shRNA screen.

**Supplementary Figure 2. *Models used to investigate Aldh3a2 depletion in vitro and in vivo.*** **A)** Representative images of a methylcellulose assay showing colony number and morphology in *Aldh3a2* depleted and control L-GMPs. **B)** Schema for generating *Aldh3a2*<sup>fl/fl</sup> mice. **C)** qPCR results showing expression of *Aldh3a2* (FALDH) splice variants V and N in *Aldh3a2*-control and mutant leukemic cells, relative to beta-actin (*Actb*).

**Supplementary Figure 3. *Aldh3a2 depletion favors normal hematopoiesis in a conditional mouse model.*** **A)** Relative peripheral blood (PB) reconstitution after transplantation of recipient B6.SJL (CD45.1) mice transfused with whole BM cells from *Aldh3a2*-control or mutant mice (CD45.2<sup>+</sup>) competed with equal numbers of wild-type CD45.1 whole BM cells (n=10 and 9 recipients per group respectively). **B)** Contribution of *Aldh3a2*-control and mutant HSPCs to peripheral blood B cells (B220), myeloid cells (Mac1, Gr1) and T cells (CD3) 24 weeks after transplantation (n=10 and 9 recipients per group respectively).

**Supplementary Figure 4. *Aldh3a2 depletion in human AML cell lines with shRNA.*** **A-D)** Effective knockdown of *ALDH3A2* expression in MOLM-14 (A), NOMO-1 (B), HL-60 (C) and NB4 cells (D) with two independent shRNAs (*ALDH3A2*-sh-A and *ALDH3A2*-sh-B) compared to control shRNA. Data are representative of at least 2 independent experiments; n=3 replicates per cell line per experiment. Data are represented as mean +/- SD. <sup>ns</sup>P>.05; \*P<.05; \*\*P<.01; \*\*\*P<.001

**Supplementary Figure 5. *Antioxidant response in ALDH3A2-depleted human AML cells.*** **A)** Ratio of oxidized to reduced glutathione in *ALDH3A2*-depleted THP-1 cells. **B)** Ratio of NADPH/NADP<sup>+</sup> in *ALDH3A2*-depleted THP-1 cells. **C)** Growth kinetics of *ALDH3A2*-depleted THP-1 cells treated with N-Acetyl-Cysteine (NAC). **D)** Schema

showing that in cells cultured in [1,2-<sup>13</sup>C<sub>2</sub>]-glucose medium, the oxidative pentose phosphate pathway (PPP) generates single <sup>13</sup>C-labeled (M1) intermediates and glycolysis generates double <sup>13</sup>C-labeled (M2) intermediates. **E**) Lactate M1/M2 ratio in *ALDH3A2*-depleted THP-1 cells. Data are representative of at least 2 independent experiments; n=3 replicates per cell line per experiment. Data are represented as mean +/- SD. <sup>ns</sup>P>.05; \*P<.05; \*\*P<.01; \*\*\*P<.001.

**Supplementary Figure 6. Metabolic role of Aldh3a2. A)** The fatty acid alcohol cycle depicting the role of Aldh3a2 in converting alcohols and aldehydes to fatty acids. Depletion of the enzyme can lead to a depletion of fatty acids and accumulation of alcohols and aldehydes.

**Supplementary Figure 7: Role of ferroptosis and apoptosis in Aldh3a2-depleted leukemia phenotype. A-C)** Frequency of live Aldh3a2-control and mutant LSPCs over three days of culture and treatment with vehicle (DMSO), ZVAD (A), Ferrostatin (B) and RSL3 (C). A snapshot of this data (for day 3) is also presented in main Figure 7D, E and F. **D)** qPCR results showing *Acs/3* expression in Aldh3a2-control and mutant leukemia cells, relative to beta-actin (*Actb*). **E)** Sublethally irradiated C57BL/6J mice were injected with Aldh3a2-control and mutant leukemia cells, from primary leukemic mice, infected with lentivirus expressing *Acs/3* or scrambled shRNA. Forty eight hours after injection mice were injected with 3 doses of Poly(I):Poly(C) on alternate days and leukemia development was monitored. Kaplan-Meier survival curve of animals that developed leukemia is shown. n=3 replicates per cell line per experiment. Data are represented as mean +/- SD. <sup>ns</sup>P>.05; \*P<.05; \*\*P<.01; \*\*\*P<.001.
